# Supplementary material
Source: PubMed Central journal article supplement (PMC7476729)
Supplement: supp_RA120.012698_158297_1_supp_560384_qd1vm8.pdf [file supp_RA120.012698_158297_1_supp_560384_qd1vm8.pdf]

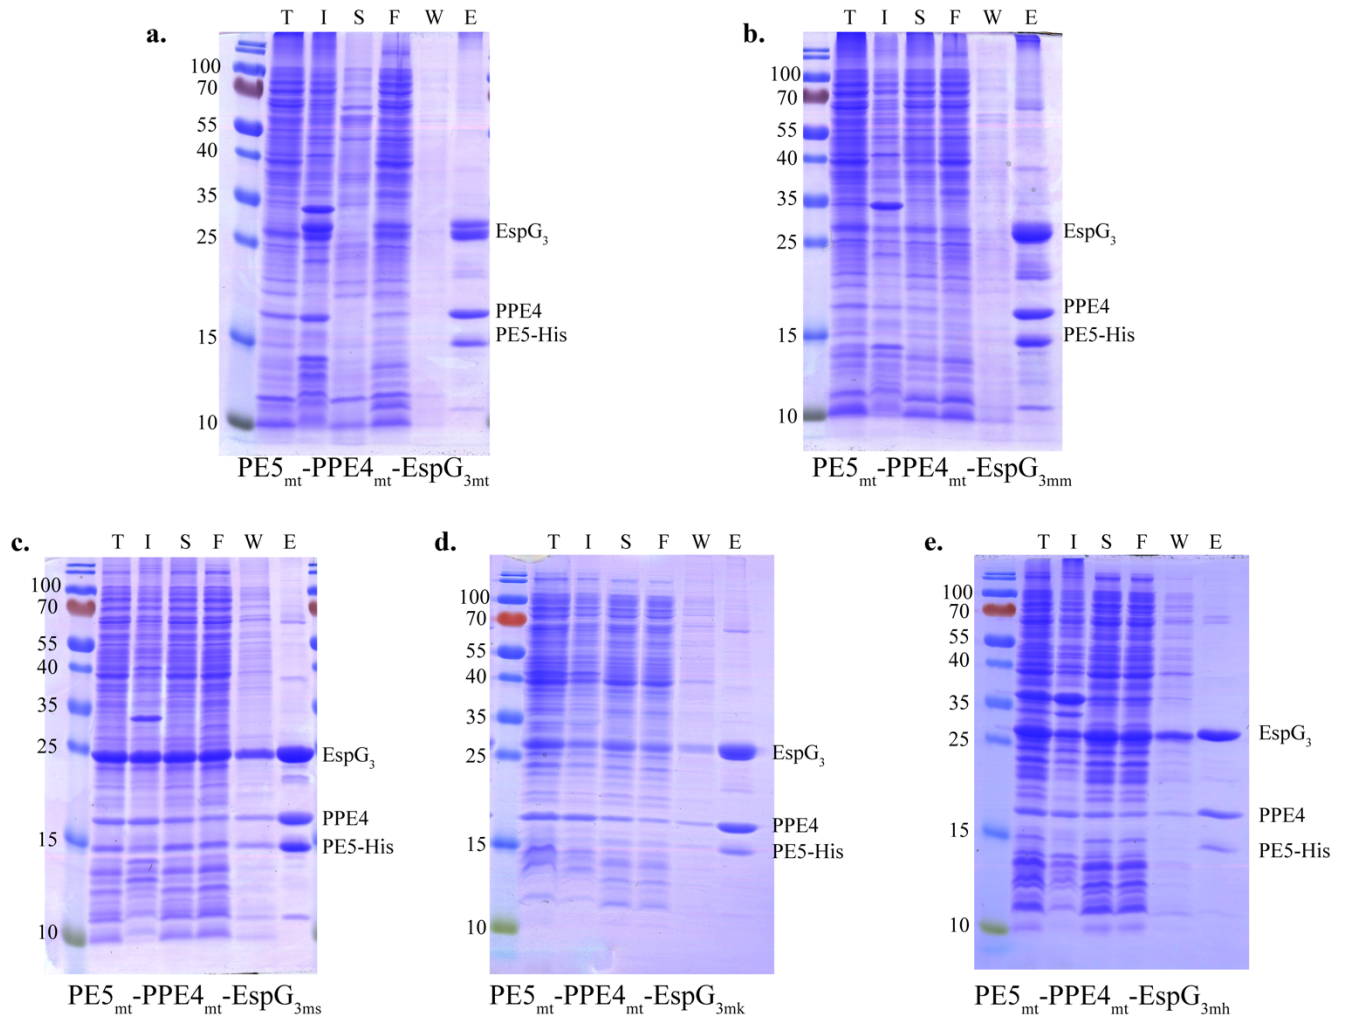

**Supplementary Figure 1. PE5<sub>mt</sub>-PPE4<sub>mt</sub> dimer is bound by EspG<sub>3</sub> from various mycobacterial species. Copurification of PE5<sub>mt</sub>-PPE4<sub>mt</sub> with *a*, EspG<sub>3mt</sub>, *b*, EspG<sub>3mm</sub>, *c*, EspG<sub>3ms</sub>, *d*, EspG<sub>3mk</sub>, or *e*, EspG<sub>3mh</sub>. T is total lysate, I is insoluble lysate, S is soluble lysate, F is column flow through, W is column wash, and E is column elution.**

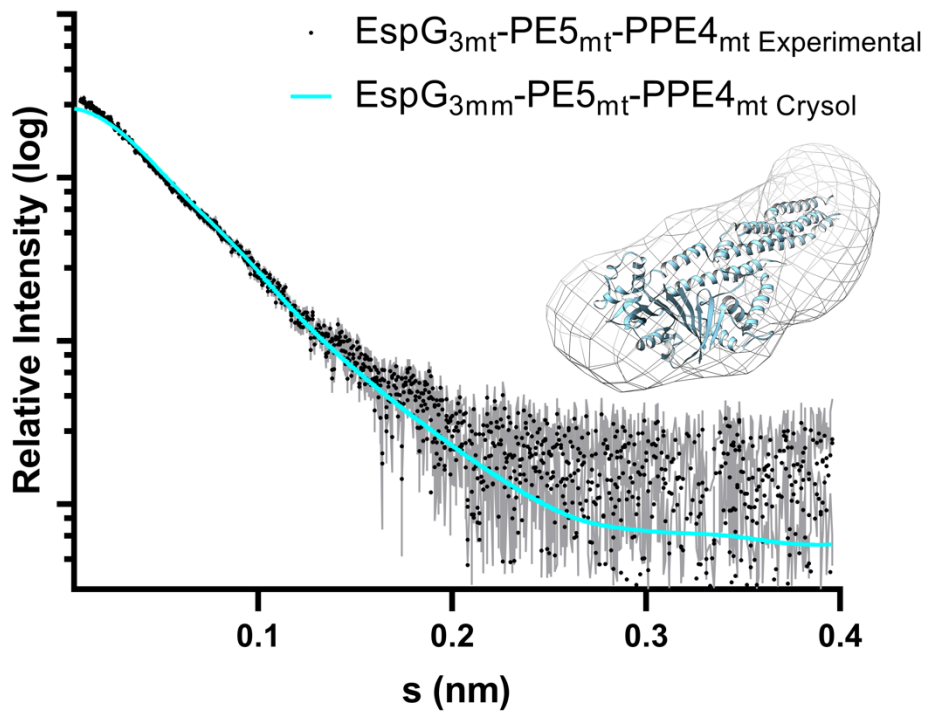

**Supplementary Figure 2. Comparison of PE5<sub>mt</sub>-PPE4<sub>mt</sub>-EspG<sub>3mm</sub> crystal structure and PE5<sub>ms</sub>-PPE4<sub>ms</sub>-EspG<sub>3ms</sub> SAXS data.** The SAXS data was originally collected in (ref) and compared to the 6UUJ structure we obtained. The  $\chi^2$  between the crystal structure and SAXS data is 2.53 as compared by CRY SOL (ref). An insert shows the 6UUJ structure inside an envelope created by GABSOR (ref).

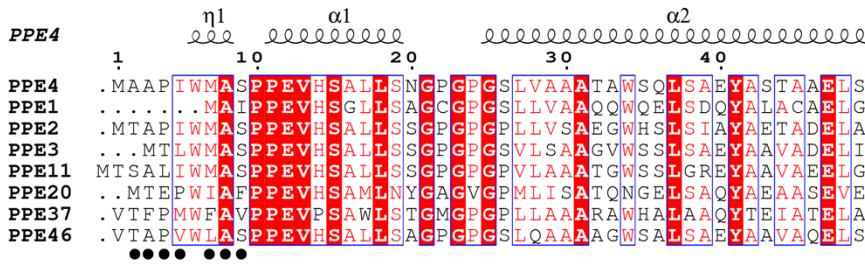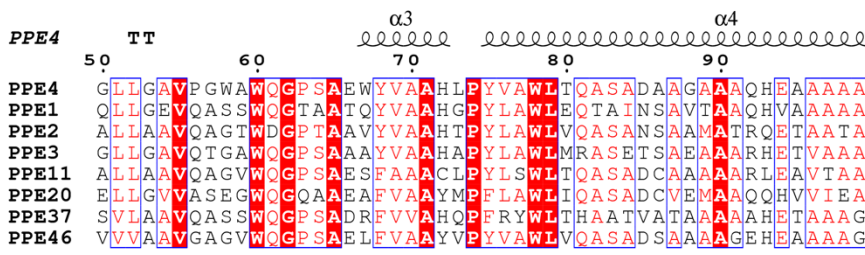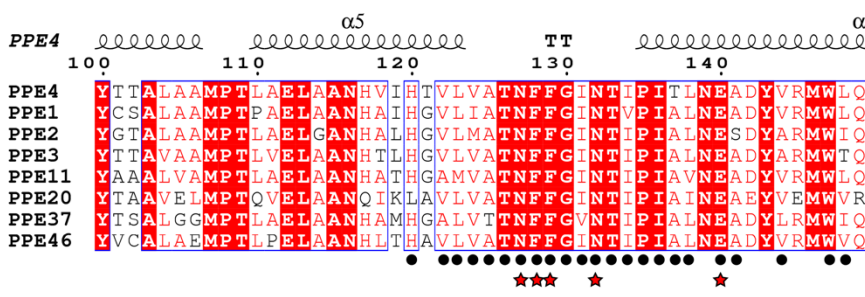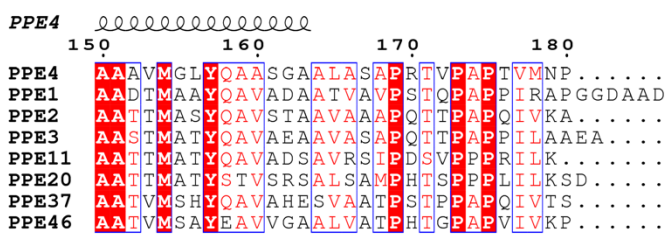

**Supplementary Figure 3. Sequence alignment of *M. tuberculosis* ESX-3-specific PPE genes.** Genomic sequences of *M. tuberculosis* PPE proteins were aligned with Clustal. The secondary structure from PPE4<sub>mt</sub> from the trimer model (6UJ) is shown above each row of the alignment. Residues that are identical across all of the ESX-3-specific PPEs are highlighted in red. Residues interacting with EspG<sub>3mm</sub> in the crystal structure are denoted with black circles and the ones that were chosen for mutagenesis are denoted with a red star.

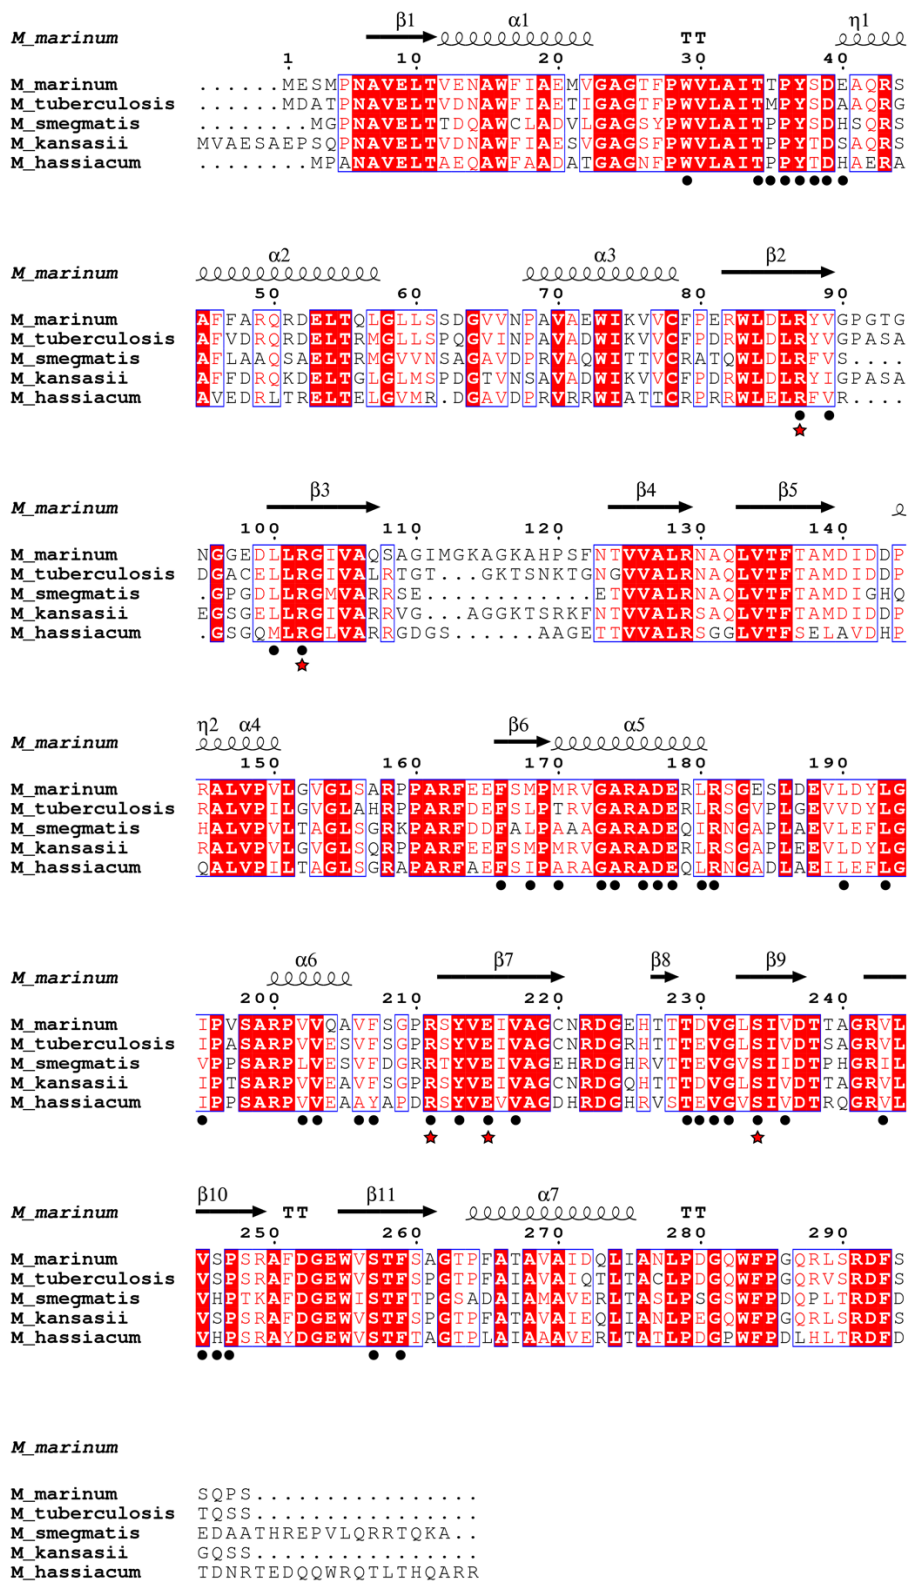

**Supplementary Figure 4. Sequence alignment of selected EspG<sub>3</sub>'s shows interacting residues are conserved.** Genomic sequences of the five EspG<sub>3</sub>s used in this study were aligned using Clustal. The secondary structure from EspG<sub>3mm</sub> from our trimer model (6UUJ) is shown above each row of the alignment. Residues that are identical across the five species are highlighted in red. Residues interacting with PPE4<sub>mt</sub> in the crystal structure are denoted with black circles and the ones that were chosen for mutagenesis are denoted with a red star.

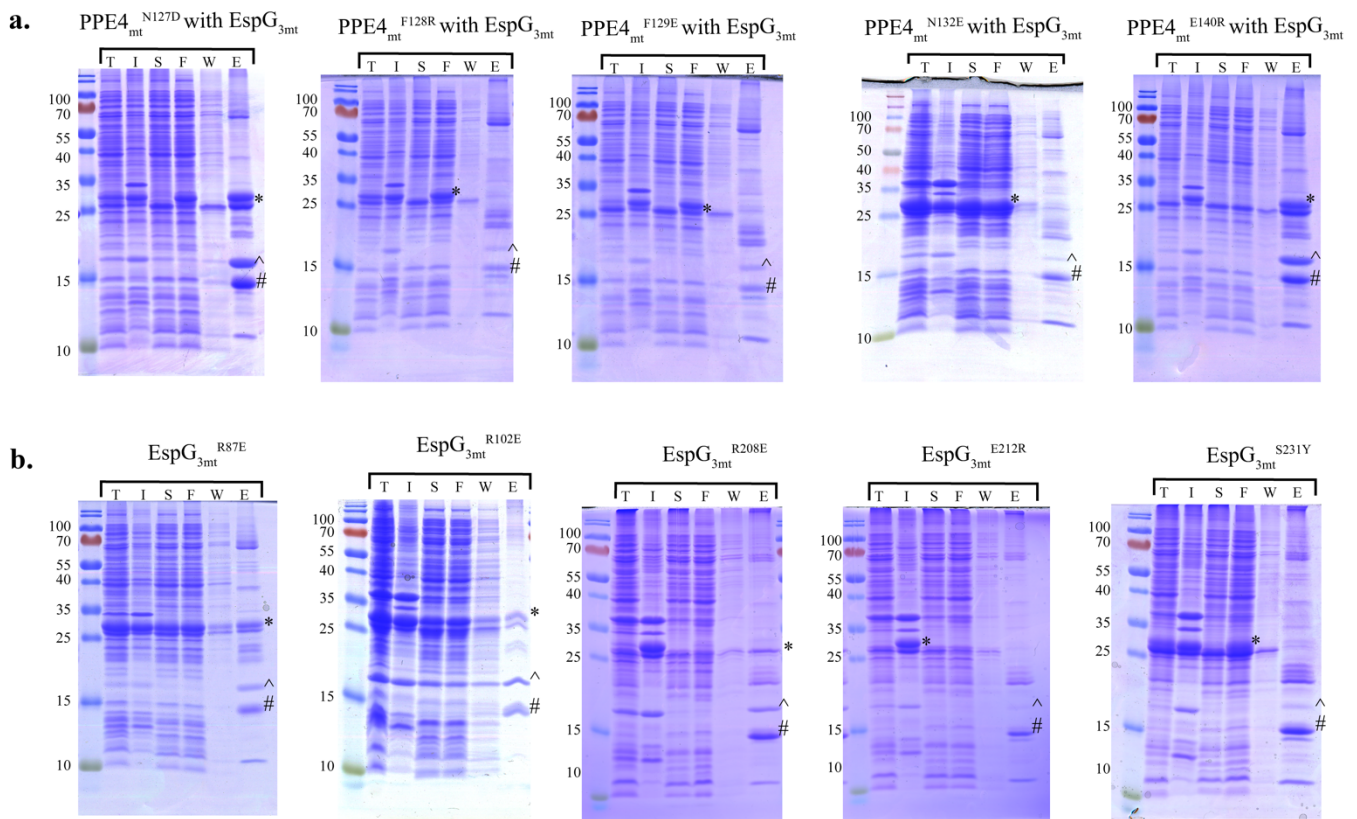

**Supplementary Figure 5. Co-purification of selected PPE4<sub>mt</sub> and EspG<sub>3mt</sub> mutants with their wild-type partners.** Gels from co-purification pulldowns of PPE4<sub>mt</sub> (a) and EspG<sub>3mt</sub> (b) mutations show which mutations disrupt the PPE4<sub>mt</sub>-EspG<sub>3mt</sub> interface (PPE4<sub>mt</sub><sup>F128R</sup>, PPE4<sub>mt</sub><sup>F129E</sup>, EspG<sub>3mt</sub><sup>E212R</sup>, EspG<sub>3mt</sub><sup>S231Y</sup>), and which do not. Results are summarized in Table 2. Each protein is denoted with a unique symbol in each gel; PE5<sub>mt</sub> (^), PPE4<sub>mt</sub> (#), and EspG<sub>5mt</sub> (\*). T is total lysate, I is insoluble lysate, S is soluble lysate, F is column flow through, W is column wash, and E is column elution. The identity of PE5<sub>mt</sub>, PPE4<sub>mt</sub>, and EspG<sub>5mt</sub> was confirmed by mass-spectrometry analysis.

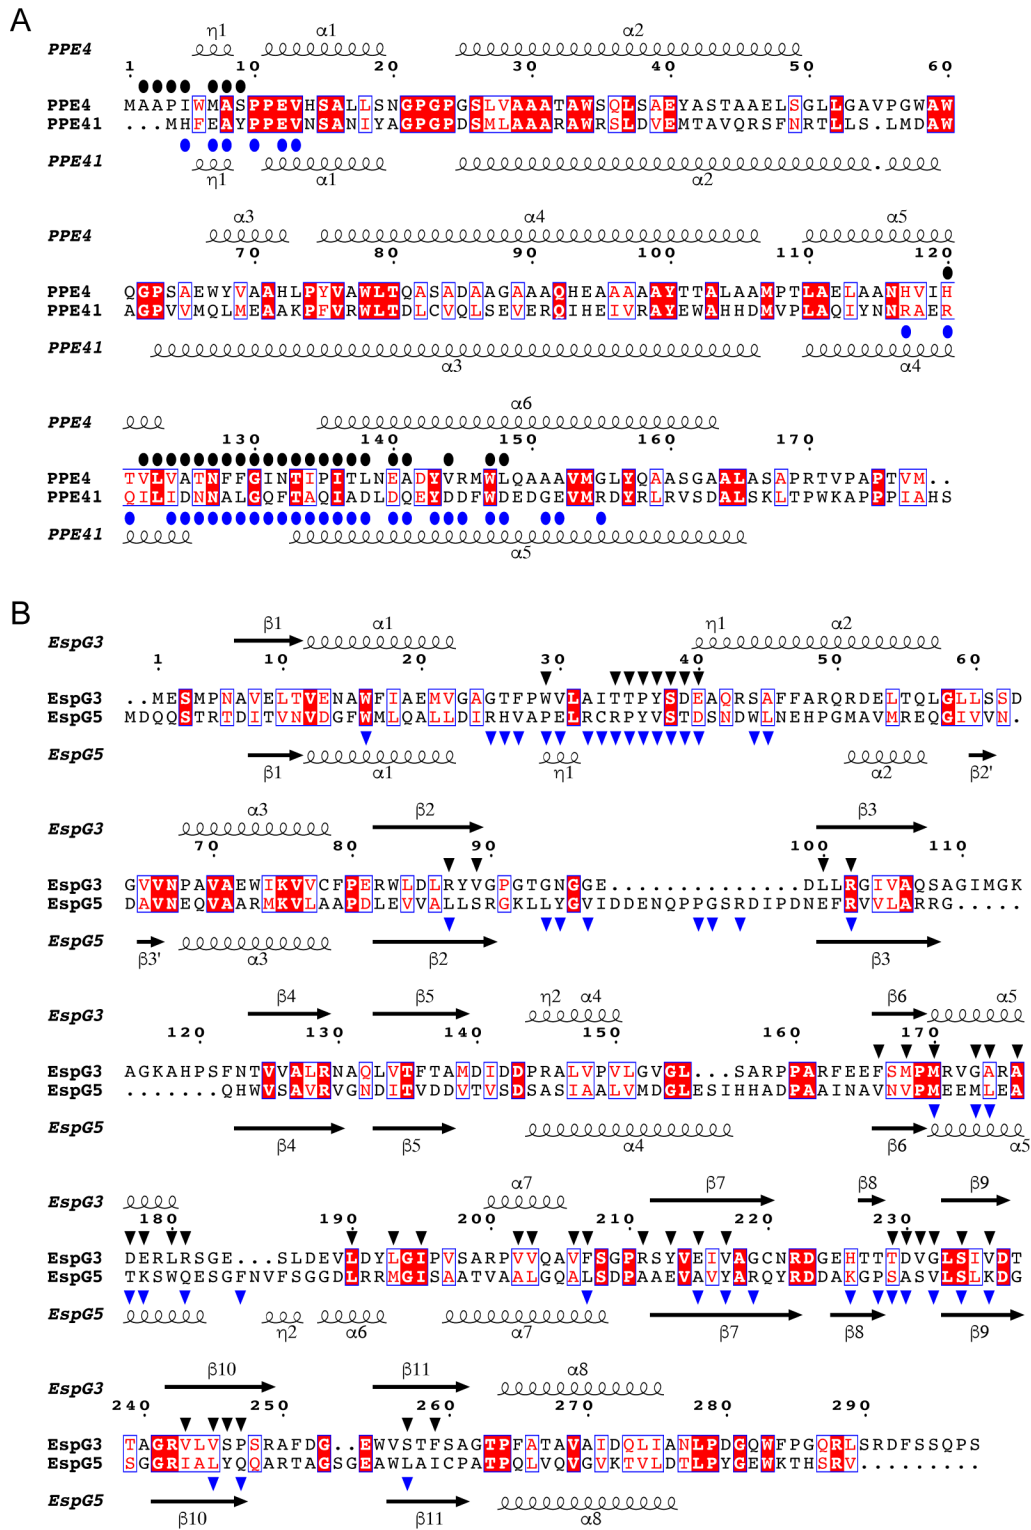

**Supplementary Figure 6. Comparison of interfaces in the ESX-3- and ESX-5-specific PPE-EspG complexes.**

*A*, Structure-based sequence alignment of PPE4 (6UUJ) and PPE41 (4KXR). Residues interacting with EspG<sub>3mm</sub> and EspG<sub>5mt</sub> chaperones are indicated with black and blue circles, respectively. *B*, Structure-based sequence alignment of EspG<sub>3mm</sub> and EspG<sub>5mt</sub>. Residues interacting with PPE4 and PPE41 are indicated with black and blue triangles, respectively.

**Supplementary Table 1.** Summary of constructs utilized for crystallization experiments and final outcomes.

| <b>PE5 construct<br/>(all constructs contain His<sub>6</sub><br/>purification tag)</b> | <b>PPE4 construct<br/>(only N-terminal<br/>PPE domain)</b> | <b>EspG<sub>3</sub><br/>construct</b> | <b>Crystallization<br/>Outcome</b>                    |
|----------------------------------------------------------------------------------------|------------------------------------------------------------|---------------------------------------|-------------------------------------------------------|
| <i>MSMEG_0618</i>                                                                      | <i>MSMEG_0619</i>                                          | <i>MSMEG_0622</i>                     | Low resolution<br>crystals                            |
| <i>MSMEG_0618</i> with MBP<br>fusion<br>(two different linker lengths)                 | <i>MSMEG_0619</i>                                          | <i>MSMEG_0622</i>                     | Low resolution<br>crystals for both<br>linker lengths |
| <i>MSMEG_0618</i> with T4L<br>fusion<br>(3 different forms of T4L)                     | <i>MSMEG_0619</i>                                          | <i>MSMEG_0622</i>                     | Poor expression of<br>trimer in all forms             |
| <i>Rv0285</i>                                                                          | <i>Rv0286</i>                                              | <i>Rv0289</i>                         | Low resolution<br>crystals                            |
| <i>Rv0285</i>                                                                          | <i>Rv0286</i>                                              | <i>MMAR_0548</i>                      | Two crystal forms<br>solved                           |
